1 **Title:**

2 **Experimental investigation to verify if excessive plastic sheeting shielding**  
3 **produce micro clusters of SARS-CoV-2**

4 **Yo Ishigaki<sup>1)</sup>, Yuto Kawauchi<sup>1)</sup>, Shinji Yokogawa<sup>1,2)</sup>, Akira Saito<sup>3)</sup>, Hiroko**  
5 **Kitamura<sup>4)</sup>, and Takashi Moritake<sup>5)</sup>**

6  
7 **Affiliations:**

- 8 1) Graduate School of Informatics and Engineering, The University of Electro-  
9 communications, Chofu, Tokyo, Japan.  
10 2) Info-powered Energy System Research Center (iPERC), The University of  
11 Electro-communications, Chofu, Tokyo, Japan.  
12 3) Miyagi Anti-Tuberculosis Association, Miyagi, Japan  
13 4) Occupational Health Training Center, University of Occupational and  
14 Environmental Health, Fukuoka, Japan  
15 5) National Institute for Quantum and Radiological Science and Technology,  
16 National Institute of Radiological Sciences, Chiba, Japan  
17

18 **Corresponding author:**

19 Shinji Yokogawa, [yokogawa@uec.ac.jp](mailto:yokogawa@uec.ac.jp), 1-5-1 Chofugaoka, Chofu, Tokyo, 182-  
20 8585, Japan.  
21

22 **Declaration of competing financial interests (CFI):**

23 The authors indicated no conflicts of interest.  
24

25 **Abstract:**

26 We experimentally investigated indoor air ventilation using the CO<sub>2</sub> tracer  
27 technique to verify the infection cluster of SARS-CoV-2 that erupted at an office  
28 space. Multi-placed observations revealed extremely low air change rates (0.1/h)  
29 at the site. The local infection clusters were observed several meters away from  
30 a door that is the only ventilation in the office, which suggests a negative effect of  
31 plastic sheeting shielding. The thermo-fluid simulation showed that the plastic  
32 sheet blocked the airflow and trapped the exhaled air in each partition cell. As  
33 risk suppression methods, improving air ventilation by opening windows and  
34 using fans were verified, and significant improvements (10–28/h) were observed  
35 for each partition cells.  
36

## 37 Introduction

38 Coronavirus disease 2019 (SARS-CoV-2) has currently spread all over the  
39 world and has changed our lives profoundly<sup>1)</sup>. As it carries a high mortality rate,  
40 public precautions such as town lockdown and regulation of traffic and telework  
41 are considered. However, several workers are forced to gather in their office, and  
42 hence, offices and administrations should enhance ventilation and install small  
43 compartment partitions as recommended<sup>2)</sup> by some local governments.

44 The infection route of SARS-CoV-2 is presented in the results and discussion  
45 section. The transmission of coronavirus 2 (SARS-CoV-2) through breath  
46 exhalation remains unclear, which can lead to severe acute respiratory syndrome.  
47 Contact and droplet infections are believed to contribute to the transmission of  
48 SARS-CoV-2, and maintaining social distancing will prevent transmission.  
49 Simultaneously, evidence for COVID-19 transmission via aerosols has been  
50 reported in the past few months<sup>3-9)</sup>. The aerosol contains particles with diameters  
51 of less than 5  $\mu\text{m}$  that can float in the air for minutes to hours. Therefore,  
52 transmission is much easier and rapid indoors than outdoors.

53 Recently, a plastic sheeting shielding (PSS) that forms the small  
54 compartments is often being installed in offices to suppress the risk of infection.  
55 However, the architectural effect of the compartments is still unclear as a  
56 preventive method for further spread of infection. The compartments will  
57 contribute to blocking aerosol transportation. Contrastingly, the concentration of  
58 the aerosol in a compartment where SARS-CoV-2 positive people stay will  
59 significantly increase and may cause a small-sized infection cluster.

60 In this study, we investigated the negative effect of the PSSs at the site of an  
61 infection cluster of COVID-19 using CO<sub>2</sub> Tracer. In March 2021, an outbreak of  
62 COVID-19 in an office with PSSs in Miyagi, Japan, involved two small-sized and  
63 separated clusters. Air ventilations of each compartment and effects of PSSs  
64 were investigated by the CO<sub>2</sub> tracer technique using dry-ice emission. Rise and  
65 fall patterns of the CO<sub>2</sub> concentration of each compartment during an experiment  
66 were compared by time-series analysis technique. The effects of opening  
67 windows and using fans were experimentally verified to improve the ventilation of  
68 each compartment. Additionally, using thermo-fluid simulation to reproduce the  
69 situation at the time the clusters were generated, we confirmed that PSSs blocked  
70 the airflow and trapped the exhaled air in each partition cell.

71

## 72 Methodology

73 In March 2021, an outbreak of COVID-19 affected 11 persons who worked  
74 at the same air-conditioned office room in Miyagi, Japan. The index case-patient  
75 experienced fever and cough and went to the hospital. Three others had become  
76 positive with COVID-19 in the following 3 days. After that, a total of seven people  
77 had become positive. The office is an air-conditioned three-floor building. The  
78 third-floor office area occupies 180 m<sup>2</sup> (6 × 30 m<sup>2</sup>), and one side of the wall which  
79 faces the outside has windows. However, as the winter cold had set in, the  
80 windows were not opened to let in fresh air.

81 Some PSS had been installed in this office, and the indoor space was  
82 compartmentalized to five areas (A, B, C, D and E). Seven or eight desks had  
83 been arranged back-to-back in the compartments, as shown in Fig. 1. Area A is  
84 a dedicated space for the management level of this office. Patients had tested  
85 positive for the COVID-19 with the polymerase chain reaction (PCR) test. Many  
86 patients worked in area B and had tested positive with PCR test. However,  
87 despite working in area C next to area B, eight persons tested negative with the  
88 PCR test. The infection had spread to area D, and four out of eight persons tested  
89 positive.

90 This skip infection spread for distant compartments gives two assumptions  
91 of the infection route for COVID-19. One is only the contact or droplet infections  
92 are dominant for COVID-19, which implies that aerosols do not affect the infection  
93 spread. However, some recent reports suggest that aerosol infection is one of the  
94 major routes of COVID-19 infection spread<sup>3-9</sup>), and the potential of the first  
95 assumption is low. The other assumption is that the aerosol infection spread is  
96 prevented by the PSS to the outside of compartments but enhanced inside. The  
97 only known source of exposure for the affected persons in the office was the index  
98 case-patient. Additionally, all workers spent the same work hours with rules of  
99 hand disinfection and wearing masks for preventing transmissions in the office.  
100 These facts support the latter assumption and suggest a necessity of government  
101 guideline revision.

102 For the verification of the latter assumption, we investigated local indoor air  
103 ventilation experimentally. Indoor airflows were observed by using the CO<sub>2</sub> tracer  
104 technique. As CO<sub>2</sub> concentration can be accounted as an alternative to exhaled  
105 air amount, local infection risk could be evaluated indirectly. In this study, dry ice  
106 was used for CO<sub>2</sub> emission, and several different types of CO<sub>2</sub> sensors were used  
107 to detect the change of local CO<sub>2</sub> concentration in the compartments. One wind

108 sensor that can detect the direction and amount of wind was used to check the  
109 airflow in a compartment.

110 Two types of non-dispersive infrared (NDIR) gas sensors applied in an  
111 environmental field are used as CO<sub>2</sub> sensors (Fig. 2). The TR-76Ui; T&D  
112 Corporation products, can detect CO<sub>2</sub> concentration ranging from 0 to 9,999 ppm  
113 with  $\pm 50$  ppm  $\pm 5\%$  accuracy of measurement. The Pocket CO<sub>2</sub> Sensor;  
114 YAGUCHI ELECTRIC CORPORATION products, can also detect CO<sub>2</sub>  
115 concentration ranging from 400 to 10,000 ppm with  $\pm 30$  ppm  $\pm 3\%$  accuracy of  
116 measurement. Four TR-76Ui and two Pocket CO<sub>2</sub> sensors were set up in the  
117 compartments as shown in Fig. 1. The symbols of S1, S3, S5, and S6 indicate  
118 TR-76Ui, and S2 and S4 indicate Pocket CO<sub>2</sub> sensor. We developed our own  
119 wind sensor by combining a unidirectional airflow sensor OMRON D6F-W with a  
120 stepping motor. The wind sensor operates minutely while spinning in 360 degrees.  
121 The maximum wind volume and its direction are recorded. It was set up in the  
122 compartment of the index case-patient. The data from each sensor were collected  
123 in the database as soon as it was measured, which resulted in some  
124 disadvantages, such as the lack of periodicity and the necessity for data  
125 completion. In this study, we used PI System™ (OSIsoft) for data management,  
126 that is, to prepare the acquired data and convert it into tidy data<sup>10)</sup> in which each  
127 variable is a column, each observation is a row, and each type of observational  
128 unit is a table with time synchronization.

129 We use CO<sub>2</sub> not only as a risk proxy but also as a ventilation tracer. For the  
130 purpose of estimating the probability of airborne transmission of an infectious  
131 agent indoors the equation called the Wells–Riley model represented by the  
132 following equation<sup>11)</sup> is widely used.

$$P = \frac{D}{S} = 1 - \exp\left(-\frac{I p q}{Q} t\right), \quad (1)$$

133 where  $P$  is the probability of infection,  $D$  is the number of disease cases,  $S$  is  
134 the number of susceptible people,  $I$  is the number of infectors,  $p$  is the  
135 breathing rate per person [ $\text{m}^3/\text{h}$ ],  $q$  is the quantum generation rate by an infected  
136 person [quanta/s],  $Q$  is the outdoor air supply [ $\text{m}^3/\text{h}$ ], and  $t$  is the total exposure  
137 time [s]. This model and its analogies are currently applied to evaluate COVID-  
138 19 infections. Especially,  $Q$  is a key factor for the infection risk of indoor  
139 environments. It suggests that the degree of inhomogeneity in indoor air is directly  
140 proportional to the risk distribution in the room. Recently, some researchers

141 claimed that the exhaled CO<sub>2</sub> can be treated as a COVID-19 infection risk proxy  
142 9, 12, 13).

143 The local infection risk can be estimated by observing time-series change in  
144 CO<sub>2</sub> concentration. Equation (2) derived from Seidel describes the concentration  
145 contaminant in a room<sup>14, 15</sup>:

$$C_i = C_0 + (C_s - C_0)e^{-\frac{Q}{V}(i-s)} + \left(1 - e^{-\frac{Q}{V}(i-s)}\right)\frac{M}{Q}, \quad (2)$$

146 where  $C_i$  is a concentration of indoor pollutants at the time  $i$ ,  $C_0$  is a  
147 concentration in the absence of pollutant sources,  $V$  is a volume of the room,  $s$   
148 is the time when CO<sub>2</sub> emission is stopped, and  $M$  is the number of pollutants  
149 generated. In the state of no generation of pollutants, eq. (2) can be transforms  
150 to:

$$\ln \frac{C_i - C_0}{C_s - C_0} = -\frac{Q}{V}(i - s). \quad (3)$$

151 This equation suggests that a decrease in the normalized concentration of  
152 pollutants with ventilation time( $i - s$ ) under no generation corresponds to air  
153 change rate ( $Q/V$ ) in the space as one of the pollutants, CO<sub>2</sub>, can be measured  
154 using sensors.

155

## 156 **Results and Discussion**

157 Indoor CO<sub>2</sub> concentration was increased by scattering crumbled dry ice on  
158 the floor without ventilation, as shown in Fig. 3. After the CO<sub>2</sub> concentration at  
159 each point reached over 6000 ppm, the decrease in values were measured with  
160 three ventilation conditions as shown in Table 1. Condition 1 simulated the  
161 ventilation condition when the outbreak of COVID-19 was confirmed. Condition 2  
162 investigates the effects of opening the windows on ventilation, and condition 3  
163 investigates the effect of added fans on the ventilation at the windows to eject  
164 indoor air to the outside. Another condition was evaluated after a CO<sub>2</sub>  
165 concentration decreased under 1000 ppm to suppress the effects of the previous  
166 condition.

167 Figure 4 indicates a rise and fall in the CO<sub>2</sub> concentration during an  
168 experiment. Concentration changes in the same compartments behaved in  
169 unison as compared to those of the other compartments. Additionally, CO<sub>2</sub>  
170 concentrations reached different levels for each compartment, for both CO<sub>2</sub>  
171 increasing and decreasing periods. The results obtained using the two types of  
172 sensors were in good agreement with these results. Temporal coincidence and

173 similarity of pattern for the time-series data pairs were evaluated using two  
174 statistical indexes. The correlation coefficient indicates the temporal coincidence  
175 of time-series data from each sensor. The minimum cumulative distance  
176 calculated by the dynamic time warping method<sup>16, 17</sup> ( $L_{dtw}$ ) indicates the similarity  
177 of CO<sub>2</sub> change pattern that depends on ventilations around sensors. The  
178 calculated result matrix is shown in Fig. 5.

179 Temporal coincidence and similarity of pattern is discussed on a scatter chart  
180 in Fig. 6. Sensors that were installed in the same compartment (S1 and S2, S2  
181 and S4) showed a high correlation coefficient ( $>0.95$ ) and comparatively small  
182  $L_{dtw}$ . Contrarily, sensors that were installed in the two adjacent compartments  
183 detected a larger  $L_{dtw}$  due to the difference in the CO<sub>2</sub> change pattern, despite  
184 the high correlation coefficient ( $>0.90$ ). More distant compartment pairs indicate  
185 a larger  $L_{dtw}$  irrespective of a correlation coefficient. These results suggest that  
186 the ventilation of the compartment is nearly independent due to the partition  
187 effects of PSSs.

188 Fig. 7 shows the results of Large-eddy simulation (LES) for condition 1 using  
189 Flowsquare+ (<https://fsp.norasci.com/>), an open-sourced thermal fluid simulator.  
190 The simulation space is 32 (W)  $\times$  8 (D)  $\times$  4 (H) m in size, and each dimension is  
191 divided into 160  $\times$  40  $\times$  20 meshes. The fluid clay coefficient  $\mu$  is  $20 \times 10^{-6}$ , and the  
192 fluid density  $\rho$  is 1.2 kg/m<sup>3</sup>. The room temperature was set to 298 K, and exhaled  
193 air containing the virus at a temperature of 309 K was expelled from the two  
194 initially infected people at a ventilation linear velocity of 1 m/s. Figure 7 shows the  
195 concentration distribution of these exhaled breaths after 30 seconds. The  
196 infectious exhaled air stays in each compartment where the initially infected  
197 person is located. The computer simulation confirms that that the ventilation of  
198 the compartments is almost independent due to the partition effect of the PSS.

199 The air change rate of each compartment was estimated using the observed  
200 CO<sub>2</sub>-decreasing data and eq. (3). As shown in Fig. 8, the change in the  
201 normalized concentration of CO<sub>2</sub> shows an approximately linear dependence on  
202 a single logarithmic chart, and the observations are plotted in the range of 95%  
203 confidence level of the model. The slope of the fitted line estimates the air change  
204 rate.

205 The comparisons of estimated air change rates of each condition are  
206 indicated in Fig. 9 with a 95% confidence interval. In condition 1, area A shows a  
207 shallow air change rate around 0.1 /h, implying poor ventilation. Area B shows an  
208 air change rate at around 0.8/h, which is significantly higher than that of condition

209 1. However, the value is not enough to prevent aerosol infection spread as  
210 reported for tuberculosis infection<sup>18, 19</sup>). Area D that is located near the entrance  
211 and area E, which is the largest, show an air change rate from 1.6 /h to 2.6 /h.

212 In condition 2, the air change rate improves from 5.1 to 8.4 by ensuring  
213 ventilation routes through windows. Additionally, the difference in the air change  
214 rate is small, and it suggests opening windows uniformly improves the ventilation  
215 of each compartment. It is enhanced by the added fans as indicated by the air  
216 change rate value from 10 to 28 in condition 3.

217 Improvement in wind volume is correlated to the change in the air change  
218 rate, as shown in Fig. 10. The wind volume in condition 1 (Fig. 10(a)) is less as  
219 compared to those of conditions 2 and 3. The wind direction to windows is  
220 improved in condition 2 (Fig. 10(b)). The addition of fans in condition 3 enhances  
221 the airflow route (Fig. 10(c)), which seems to be related to the entrance as an air  
222 intake (see Fig. 1). After the decontamination operation of the COVID-19  
223 outbreak, this office is operated with the ventilation of condition 3, and no  
224 additional PCR test positives were found for two months up to the time of this  
225 writing.

226

## 227 **Conclusions**

228 Statistical time-series data analysis of rising and fall patterns in the CO<sub>2</sub>  
229 concentration indicates that PSSs separate the ventilation of compartments that  
230 contribute, prevent, and enhance the cluster of COVID-19. The computer  
231 simulation also confirmed that each compartment was ventilated almost  
232 independently due to the partitioning effect of the PSSs. Opening windows and  
233 using fans improve the ventilation in each compartment uniformly, and contribute  
234 to the prevention of cluster recurrence.

235 The installation of PSSs is supposed to prevent droplet infection and give  
236 users a sense of psychological security. However, if the ventilation capacity is  
237 reduced by PSSs, the risk of airborne infection by droplet nuclei must be  
238 considered. In addition, it is necessary to educate users so that they do not  
239 engage in risk-taking behaviors (e.g., removing masks, shouting) due to  
240 overconfidence in the effectiveness of PSSs.

241 This paper analyzed one case of a characteristic infection cluster in which  
242 PSSs may have been involved. As a next step, comprehensive simulations of  
243 how ventilation conditions change with the layout, height, and placement of

244 ventilation equipment in PSSs would provide more general insight into the impact  
245 of PSSs.

246

## 247 **Notes**

248 The authors indicated no conflicts of interest.

249

## 250 **Acknowledgments**

251 This work was supported by Research Grant Program of KDDI Foundation.

252

## 253 **References**

- 254 1) World Health Organization. Coronavirus Disease (COVID-2019) Situation  
255 Reports; 2021.
- 256 2) Tokyo Metropolitan Government Disaster Prevention Information,  
257 <https://www.bousai.metro.tokyo.lg.jp/taisaku/torikumi/1008262/1013511/index.html>.  
258
- 259 3) Prather, K. A., L. C. Marr, R. T. Schooley, M. A. McDiarmid, M. E. Wilson, and  
260 D. K. Milton, "Airborne transmission of SARS-CoV-2," *Science*, 2020, 370  
261 (6514), 303, pp. 2-304.
- 262 4) Tang, J. W., W. P. Bahnfleth, P. M. Bluyssen, G. Buonanno, J. L. Jimenez, J.  
263 Kurnitski, Y. Li, S. Miller, C. Sekhar, L. Morawska, et al., "Dismantling myths  
264 on the airborne transmission of severe acute respiratory syndrome  
265 coronavirus-2 (SARS-CoV-2)," *J. Hosp. Infect.*, 2021, 110, pp. 89-96.
- 266 5) Morawska, L. and D. K. Milton, "It is time to address airborne transmission of  
267 coronavirus disease 2019 (COVID-19)," *Clin. Infect. Dis.* 2020, 71 (9), pp.  
268 2311-2313.
- 269 6) Miller, S. L., W. W. Nazaroff, J. L. Jimenez, A. Boerstra, G. Buonanno, S. J.  
270 Dancer, J. Kurnitski, L. C. Marr, L. Morawska, and C. Noakes, "Transmission  
271 of SARS-CoV-2 by inhalation of respiratory aerosol in the Skagit Valley  
272 Chorale superspreading event," *Indoor Air*, 2021, 31 (2), pp. 314-323.
- 273 7) Lu, J., J. Gu, K. Li, C. Xu, W. Su, Z. Lai, D. Zhou, C. Yu, B. Xu, and Z. Yang,  
274 "COVID-19 outbreak associated with air conditioning in restaurant,  
275 Guangzhou, China, 2020," *Emerg. Infect. Dis.*, 2020, 26 (7), pp. 1628-1631.
- 276 8) Smith, S. H., G. A. Somsen, C. van Rijn, S. Kooij, L. van der Hoek, R. A. Bem,  
277 and D. Bonn, "Aerosol persistence in relation to possible transmission of  
278 SARS-CoV-2," *Phys. Fluids*, 2020, 32, pp. 107108-1-107108-7.



- 279 9) Peng, Z. and J. L. Jimenez, "Exhaled CO<sub>2</sub> as a COVID-19 infection risk proxy  
280 for different indoor environments and activities," *Environ. Sci. Technol. Lett.*,  
281 <https://doi.org/10.1021/acs.estlett.1c00183>.
- 282 10) Wickham, H., "Tidy data," *J. Stat. Soft.*, 2014, 59 (10), doi:10.18637/jss.  
283 v059.i10.
- 284 11) Riley, E. C., G. Murphy, R. L. Riley, "Airborne spread of measles in a suburban  
285 elementary school," *Am. J. Epidemiol.*, 1978, 107 (5), pp. 421-432.
- 286 12) Rudnick, S. N. and D. K. Milton, "Risk of indoor airborne infection  
287 transmission estimated from carbon dioxide concentration," *Indoor Air*, 2003,  
288 13, pp. 237-245.
- 289 13) Bhagat, K. B., M. S. Davies Wykes, S. B. Dalziel, and P. F. Linden, "Effects  
290 of ventilation on the indoor spread of COVID-19," *J. Fluid Mech.*, 2020, 903.
- 291 14) Tarumi, H., "Text of architecture environment: design of thermal and air," in  
292 Japanese, ISBN: 9784753017430, Inoue Shoin, Aug. 2007.
- 293 15) Ito, S. and H. Nishi, "Estimation of the number of people under controlled  
294 ventilation using a CO<sub>2</sub> concentration sensor," *IECON 2012*,  
295 <https://doi.org/10.1109/IECON.2012.6388997>.
- 296 16) Keogh E. and C. A. Ratanamahatana, "Exact index of dynamic time warping,"  
297 *Knowl. Inf. Syst.*, 2004, 7, pp. 358-386.
- 298 17) Giorgino, T., "Computing and visualizing dynamic time warping alignments in  
299 R: The dtw package," *J. Stat. Soft.*, Foundation for Open Access Statistics,  
300 2009, 31(i07).
- 301 18) Menzies D., A. Fanning, L. Yuan, *et al.*, "Hospital ventilation and risk for  
302 tuberculous infection in Canadian health care workers. Canadian  
303 collaborative group in nosocomial transmission of TB," *Ann. Intern. Med.*  
304 2000, 133, pp. 779-789.
- 305 19) Hella, J., C. Morrow, F. Mhimbira, S. Ginsberg, N. Chitnis, S. Gagneux, B.  
306 Mutayoba, R. Wood, and L. Fenner, "Tuberculosis transmission in public  
307 locations in Tanzania: A novel approach to studying airborne disease  
308 transmission," *J. Infect.*, 2017, 75, pp. 191-197.
- 309

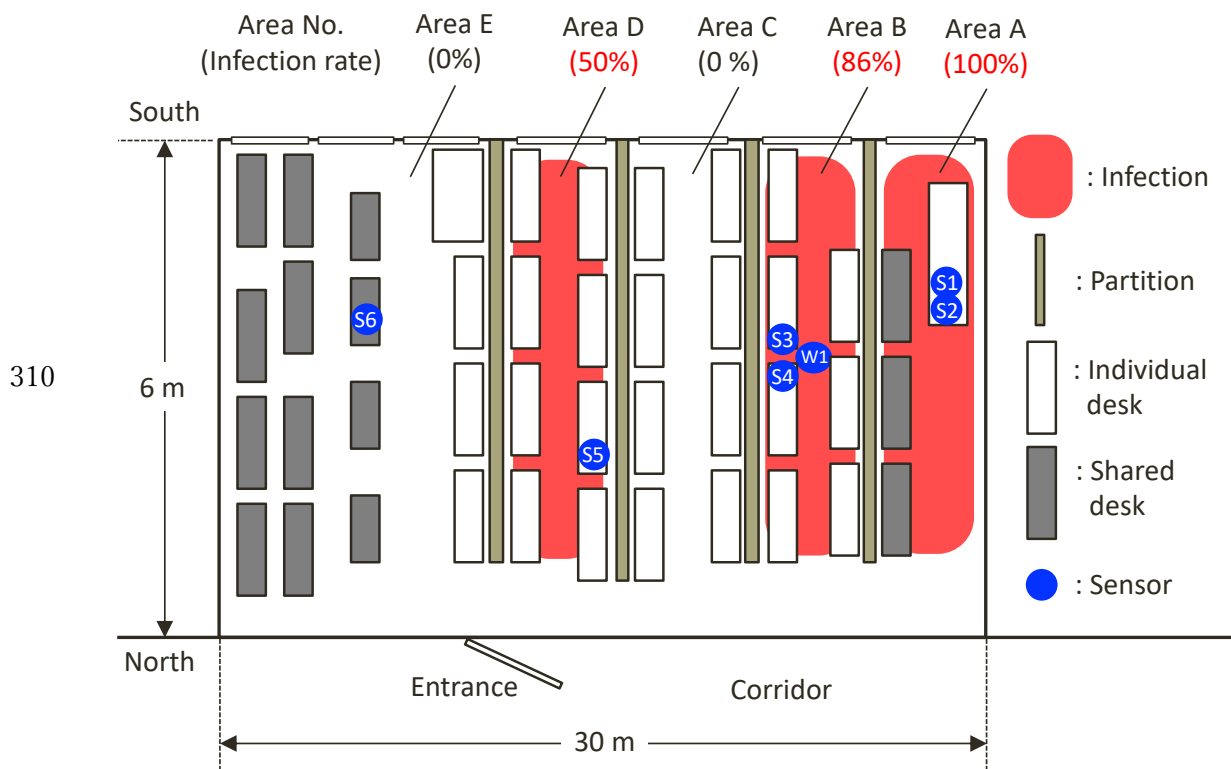

311 Fig. 1. Synoptic view showing the arrangement of partitions and desks at the site  
 312 of COVID-19 outbreak, Miyagi, Japan, 2021. Red-hatch zones indicate the area  
 313 in that desks of case-patients were arranged; white zones indicate an unaffected  
 314 desk area.

315

316

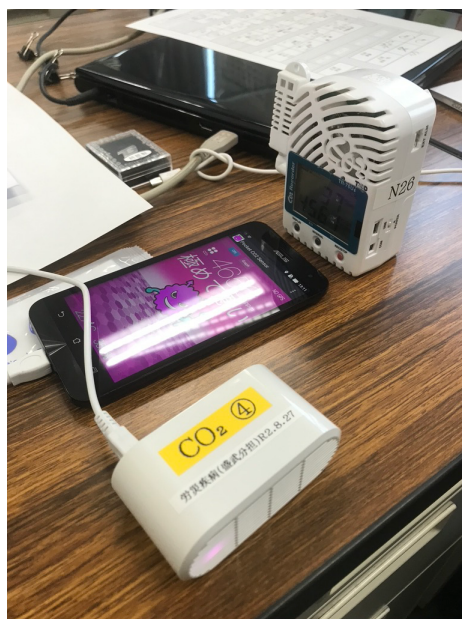

317 Fig. 2. Photograph showing sensors used in this study. Upper: TR-76Ui; Lower:  
 318 Pocket CO<sub>2</sub> sensor.

319  
 320

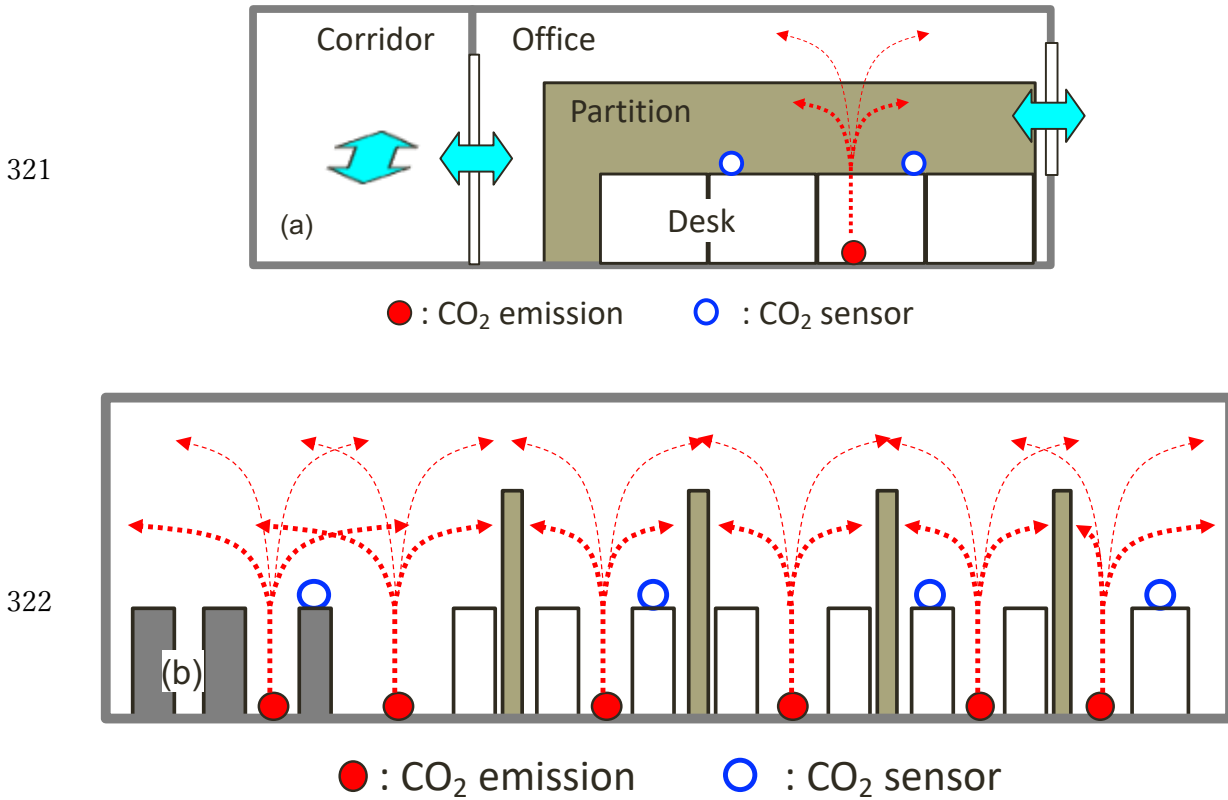

323 Fig. 3. Cross-sectional conceptual diagram of experiments. Red arrows show  
 324 CO<sub>2</sub> emission and diffusion. Blue arrows indicate the ventilation of this office.

325  
 326

Table 1. Experimental conditions.

|                     | Condition 1               | Condition 2               | Condition 3                        |
|---------------------|---------------------------|---------------------------|------------------------------------|
| Purpose             | Replication of infections | Effects of window opening | Effects of window opening and fans |
| Room entrance       | Open                      | Open                      | Open                               |
| Windows of corridor | Closed                    | Open                      | Open                               |
| Room windows        | Closed                    | Open                      | Open                               |

|      |         |         |          |
|------|---------|---------|----------|
| Fans | w/o fan | w/o fan | with fan |
|------|---------|---------|----------|

327  
328

329

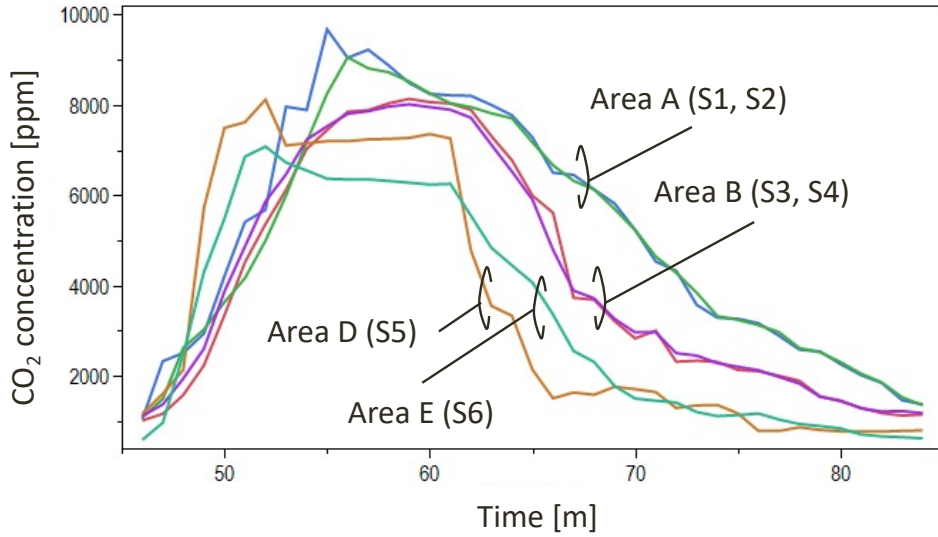

330  
331  
332

Fig. 4. Line plot representing the CO<sub>2</sub> concentration change in the experiment of condition 2.

333

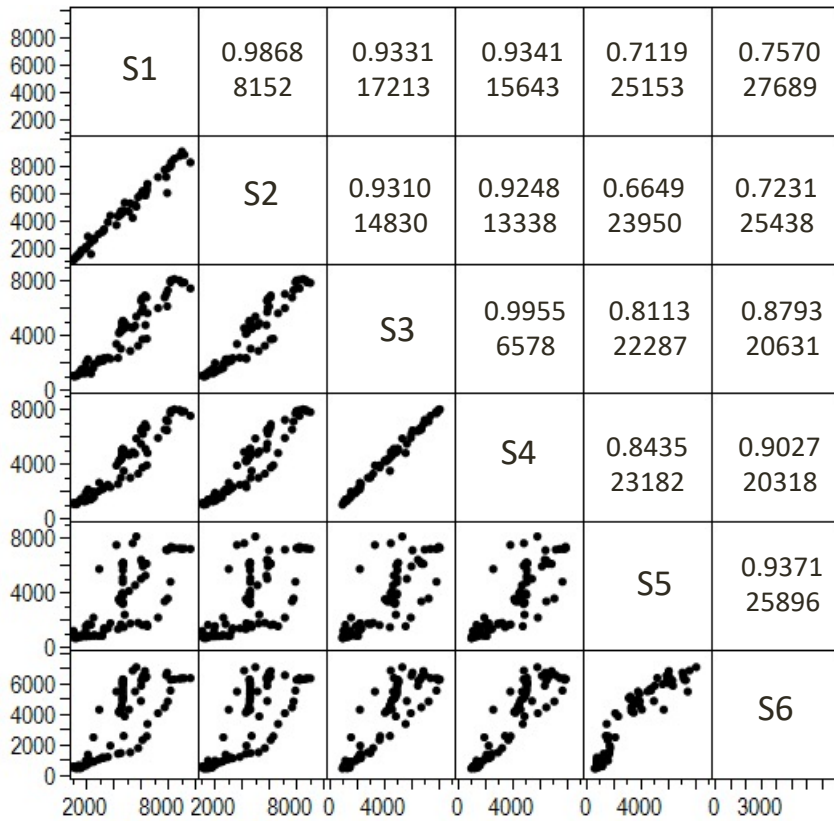

334 Fig. 5. Correlation coefficient and minimum cumulative distance matrix of each  
 335 sensor data pair.  
 336

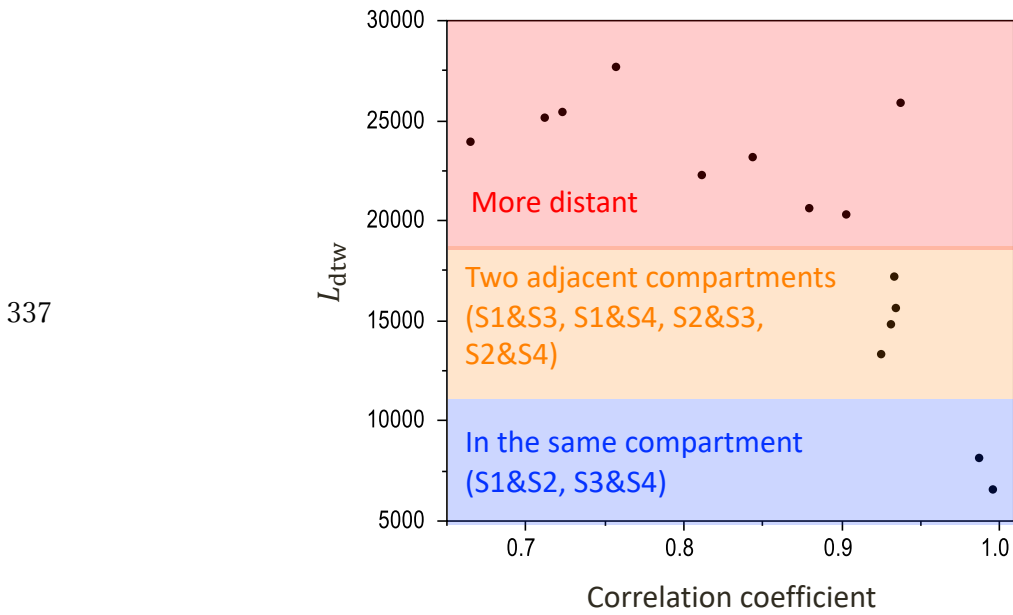

338 Fig. 6. Scatter plot of correlation coefficient and minimum cumulative distance of  
 339 each sensor data pair.  
 340

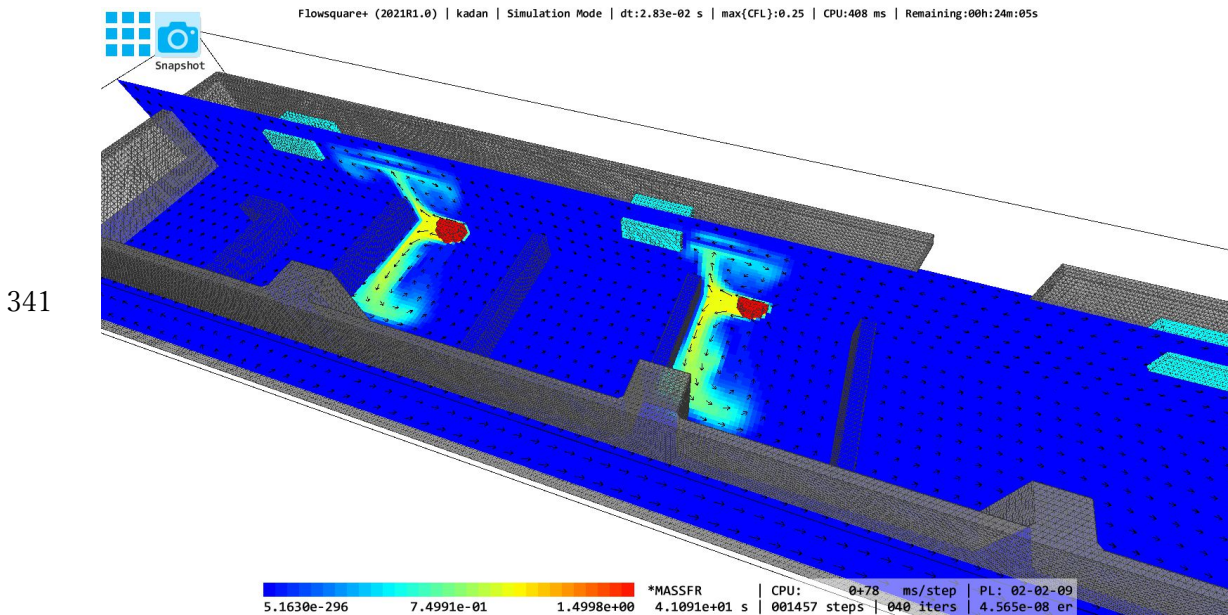

342  
 343 Fig. 7. Concentration distribution of infectious aerosol at condition 1 reproduced  
 344 by thermo-fluid simulation.

345  
346

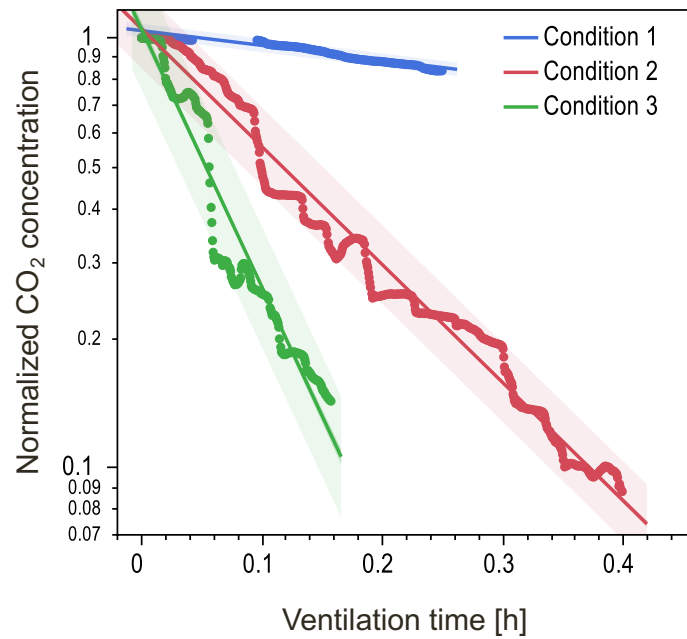

347

348 Fig. 8. Time-series CO<sub>2</sub> concentration plot as an example of local air change rate  
349 estimation based on eq. (3). Straight lines indicate least-square fitting and colored  
350 bands indicate 95% confidence interval of individual observations.

351  
352  
353

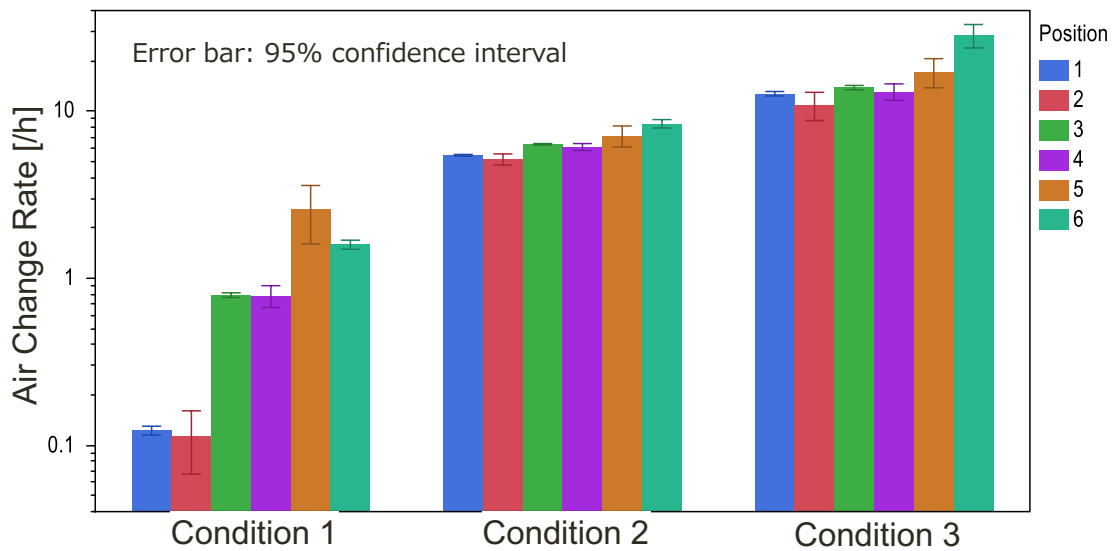

354

355 Fig. 9. Bar plot showing the comparison of estimated air change rate of each  
356 location and condition.

357

358

359

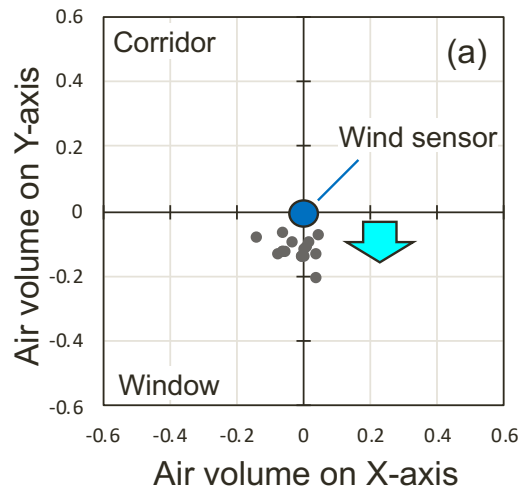

360

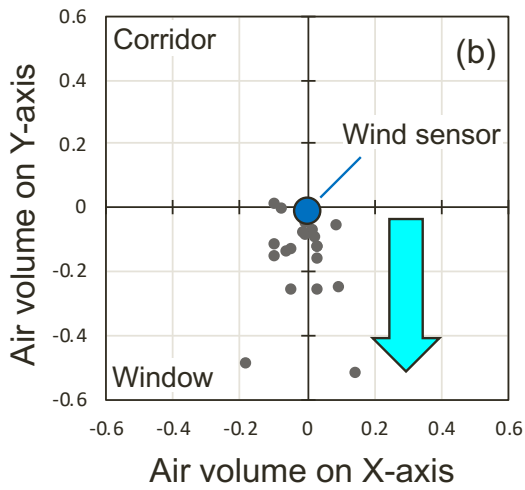

361

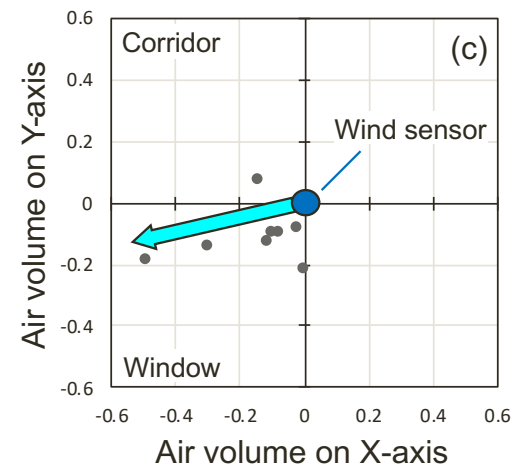

362

363 Fig. 10. Scatter plot for the observation results of wind sensor for each condition.  
364 (a) Condition 1, (b) Condition 2, and (c) Condition 3.
